# Supplementary material for: Bach1 promotes muscle regeneration through repressing Smad-mediated inhibition of myoblast differentiation
Source: PubMed Central journal article supplement (PMC7416950; doi:10.1371/journal.pone.0236781), 2020-08-10

Fig 3

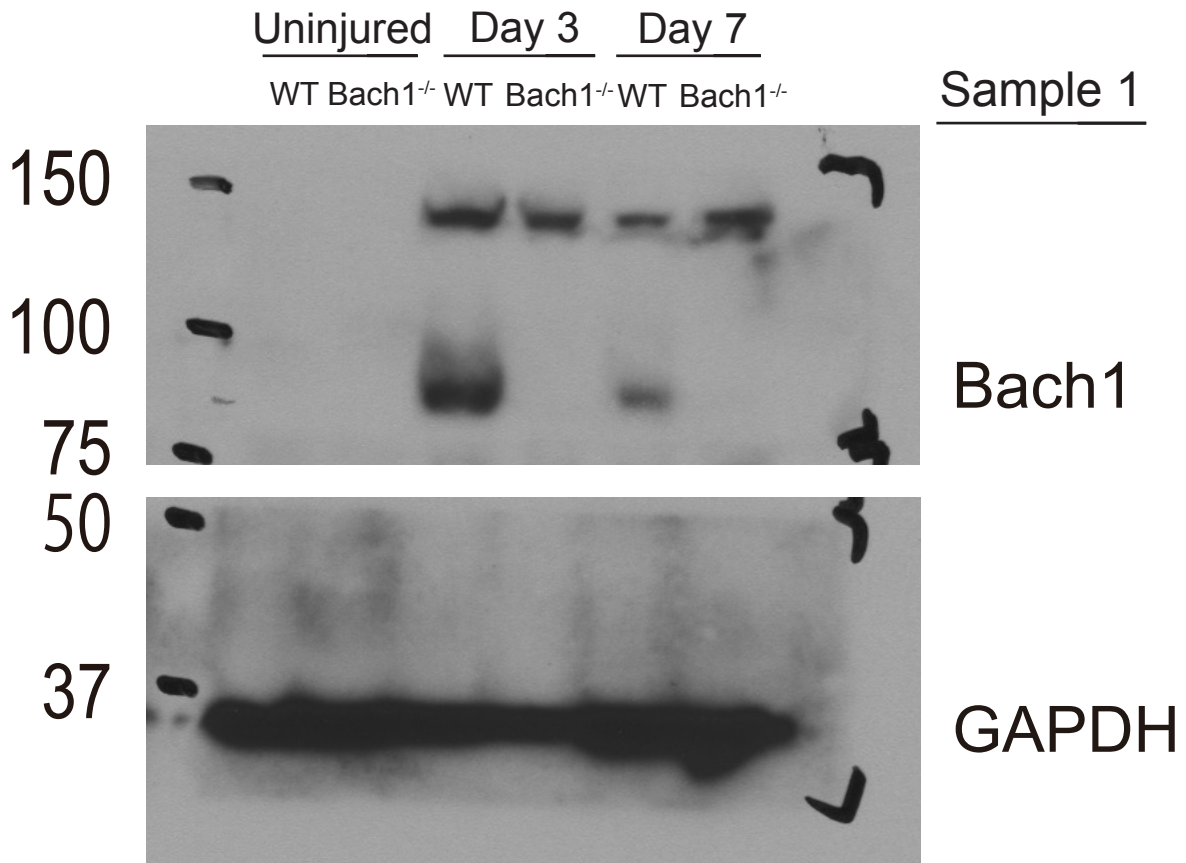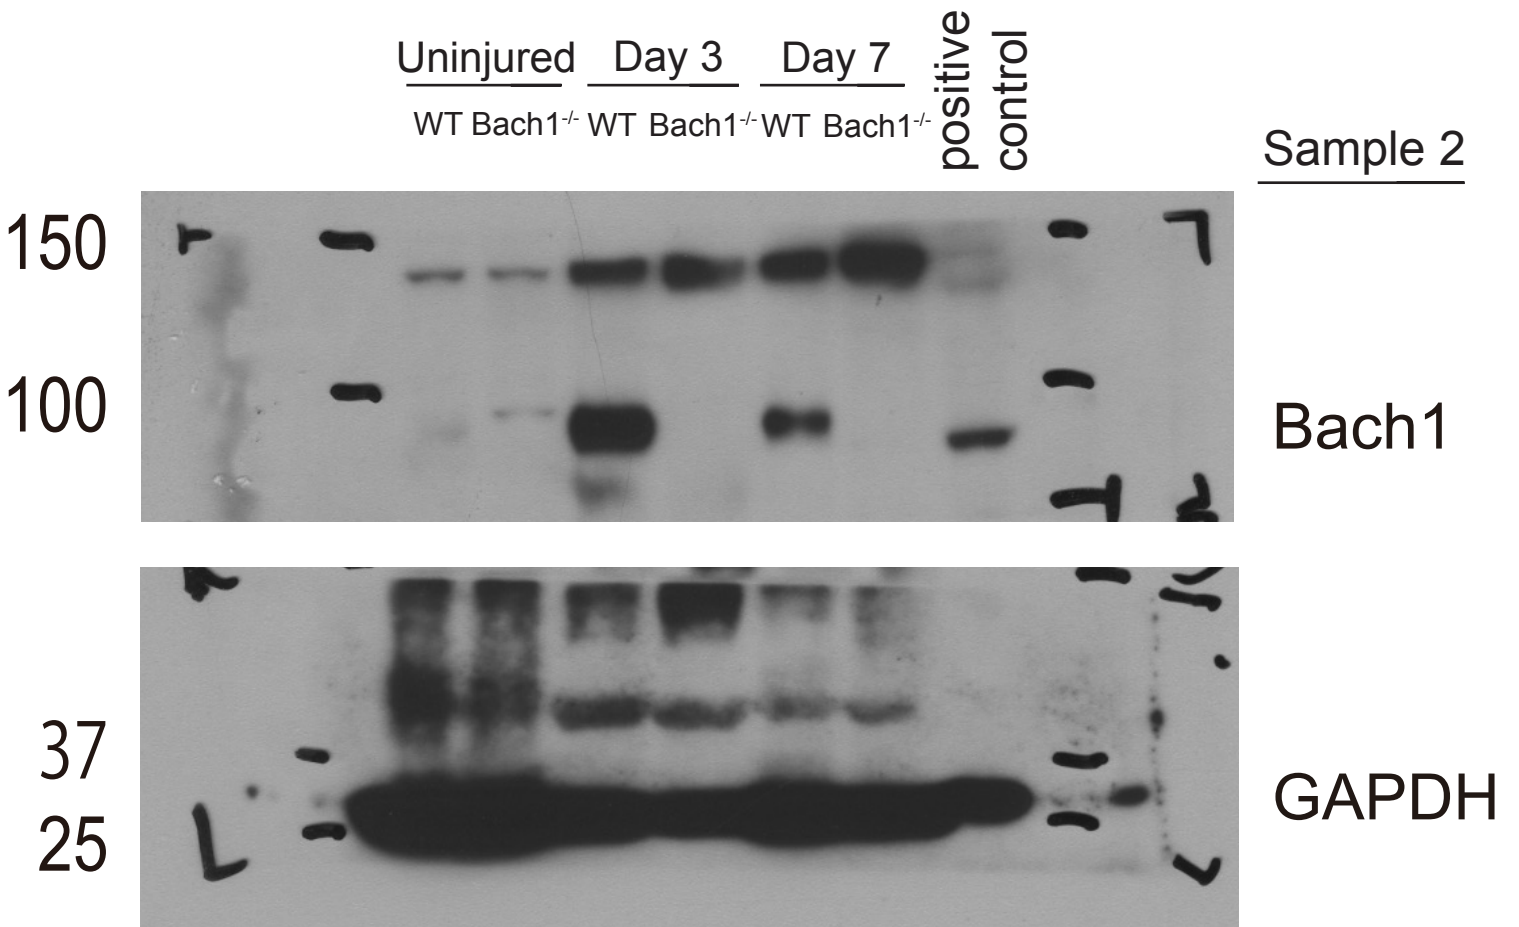

Fig 4

Marker               M1 cells               C2C12 cells      Marker

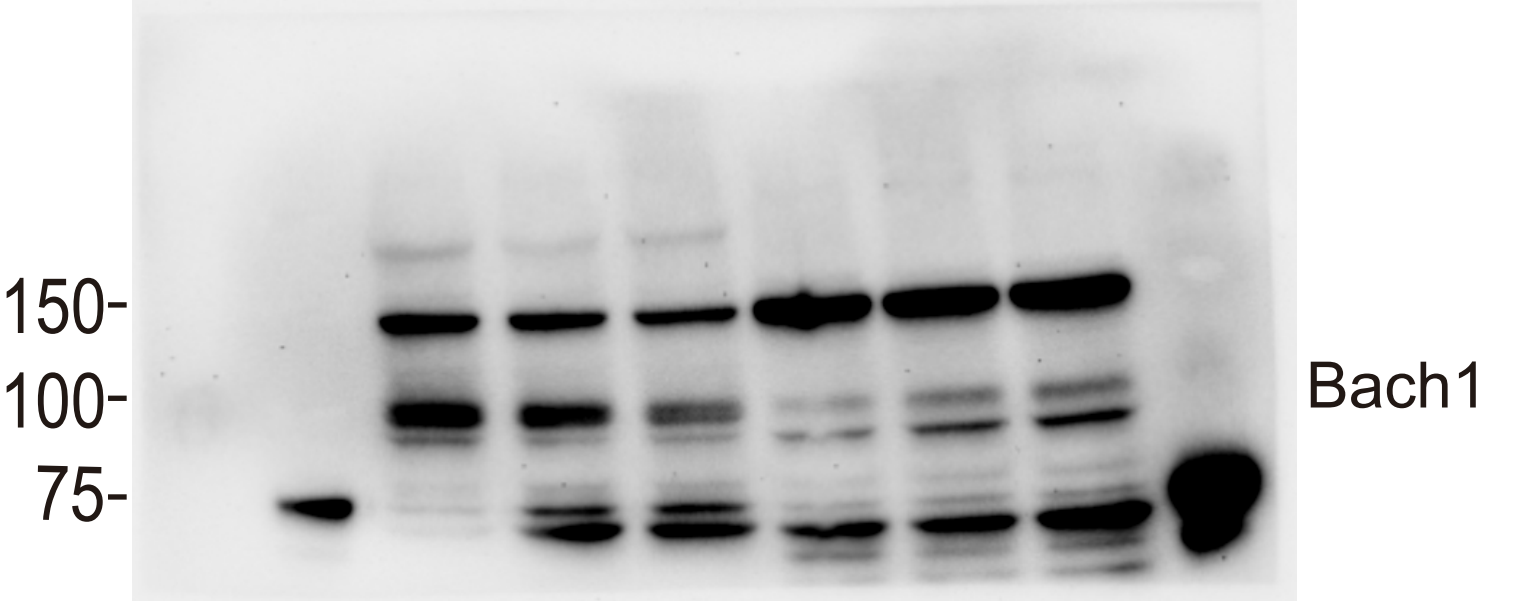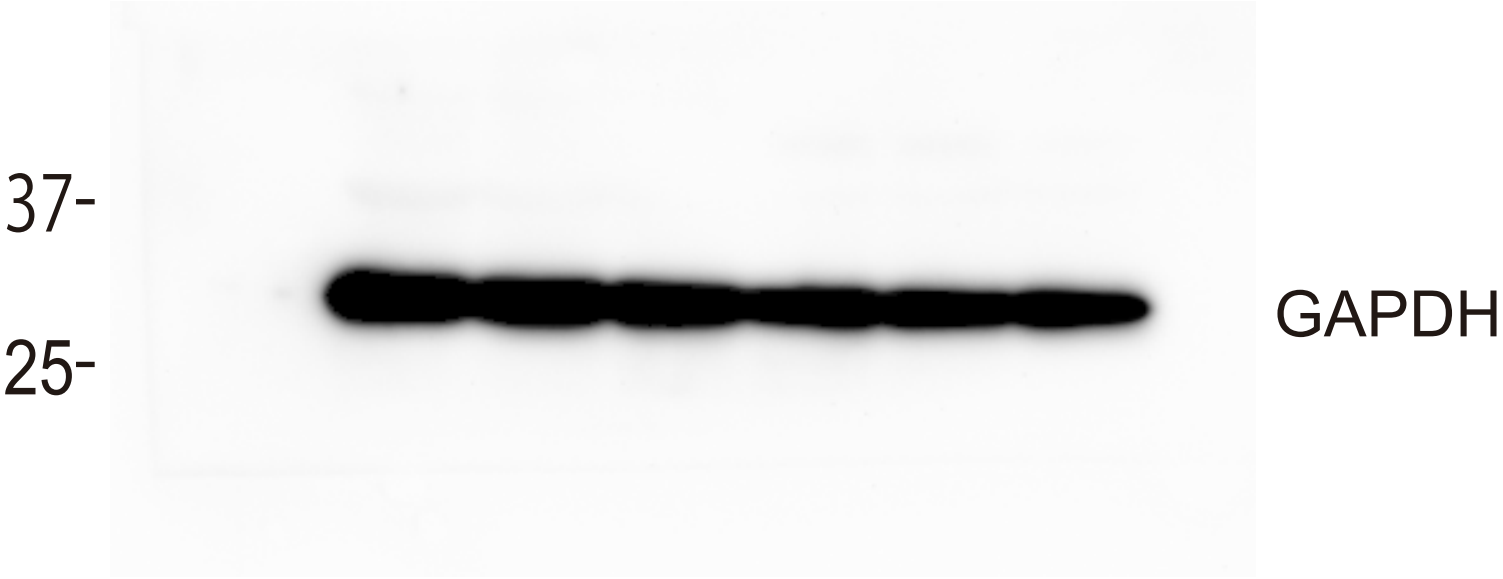

Fig 6

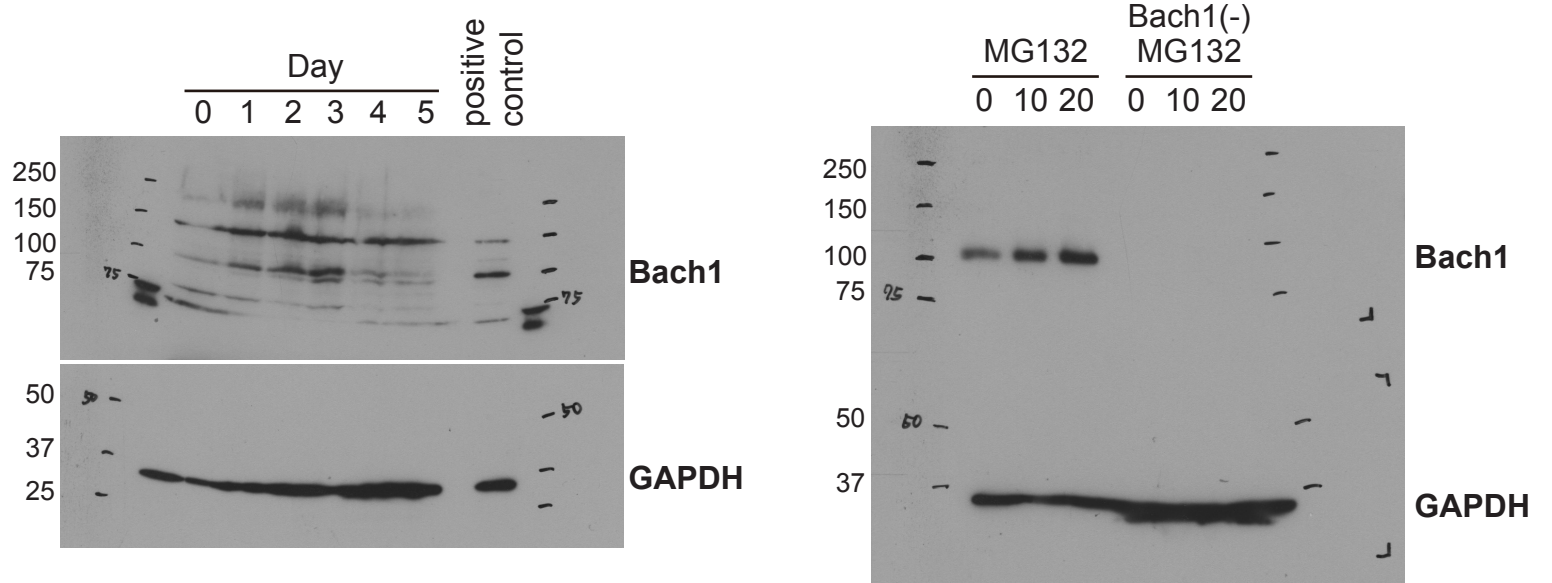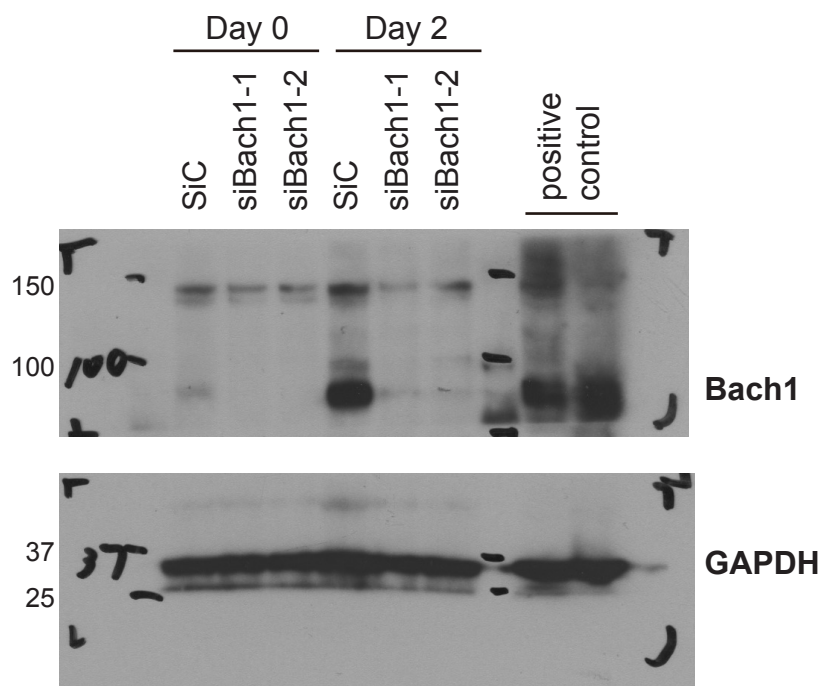

Fig 8

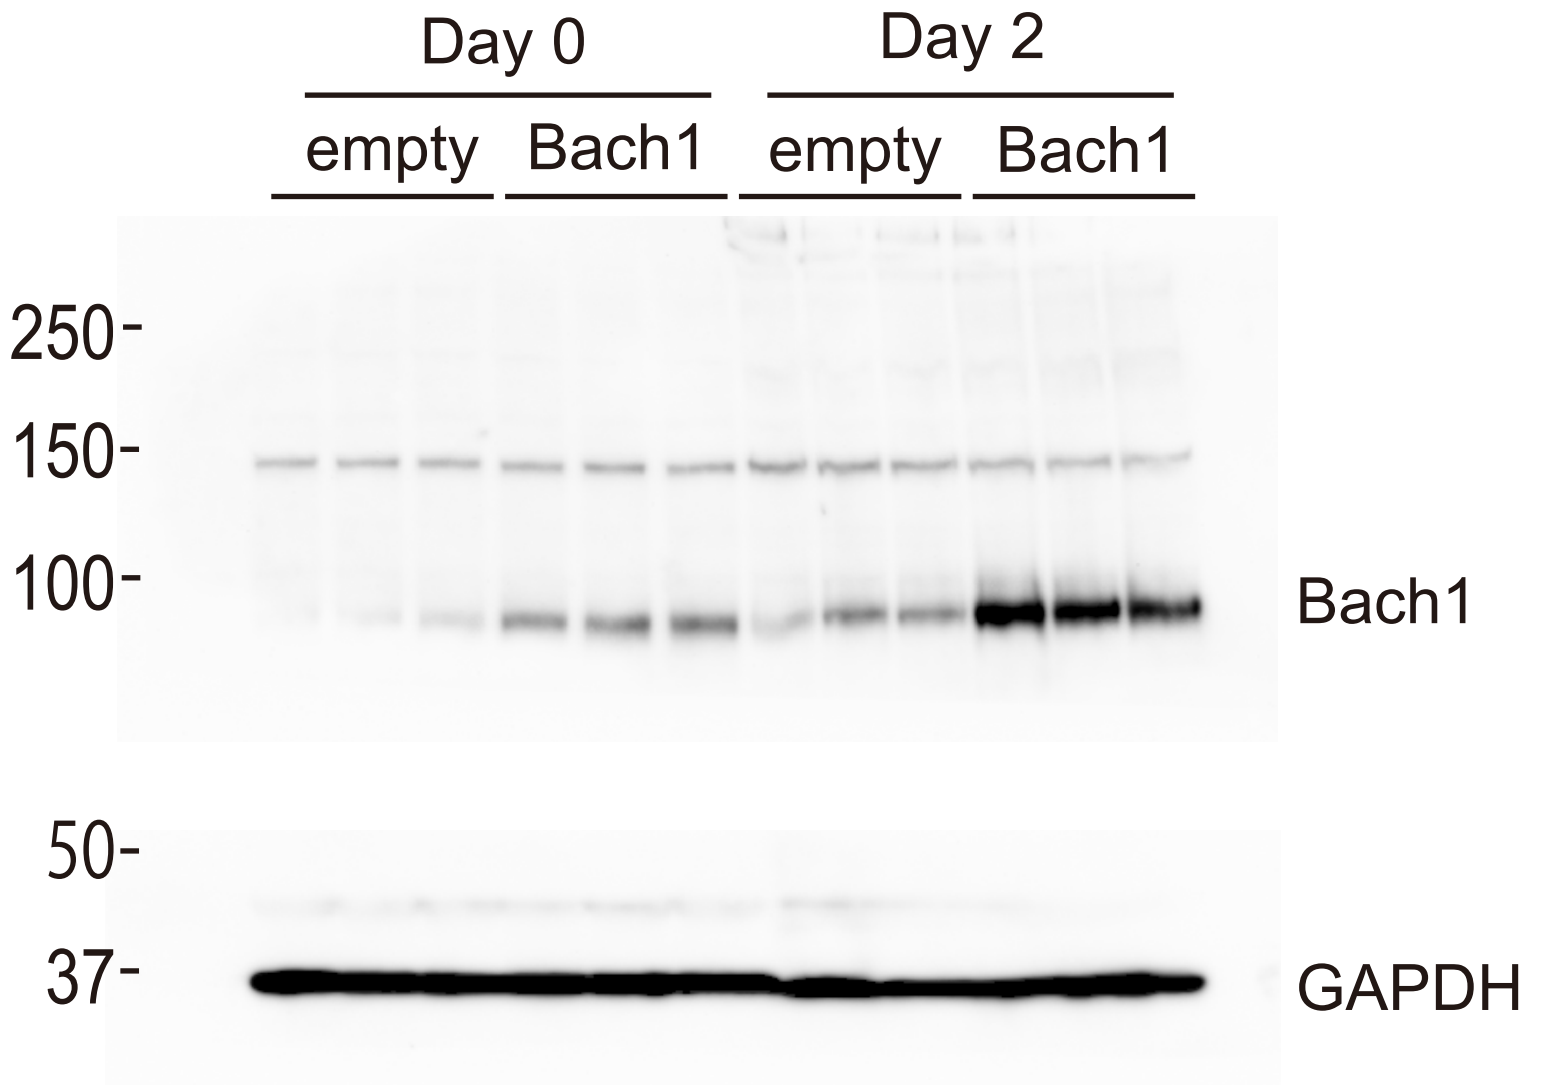

Fig 11

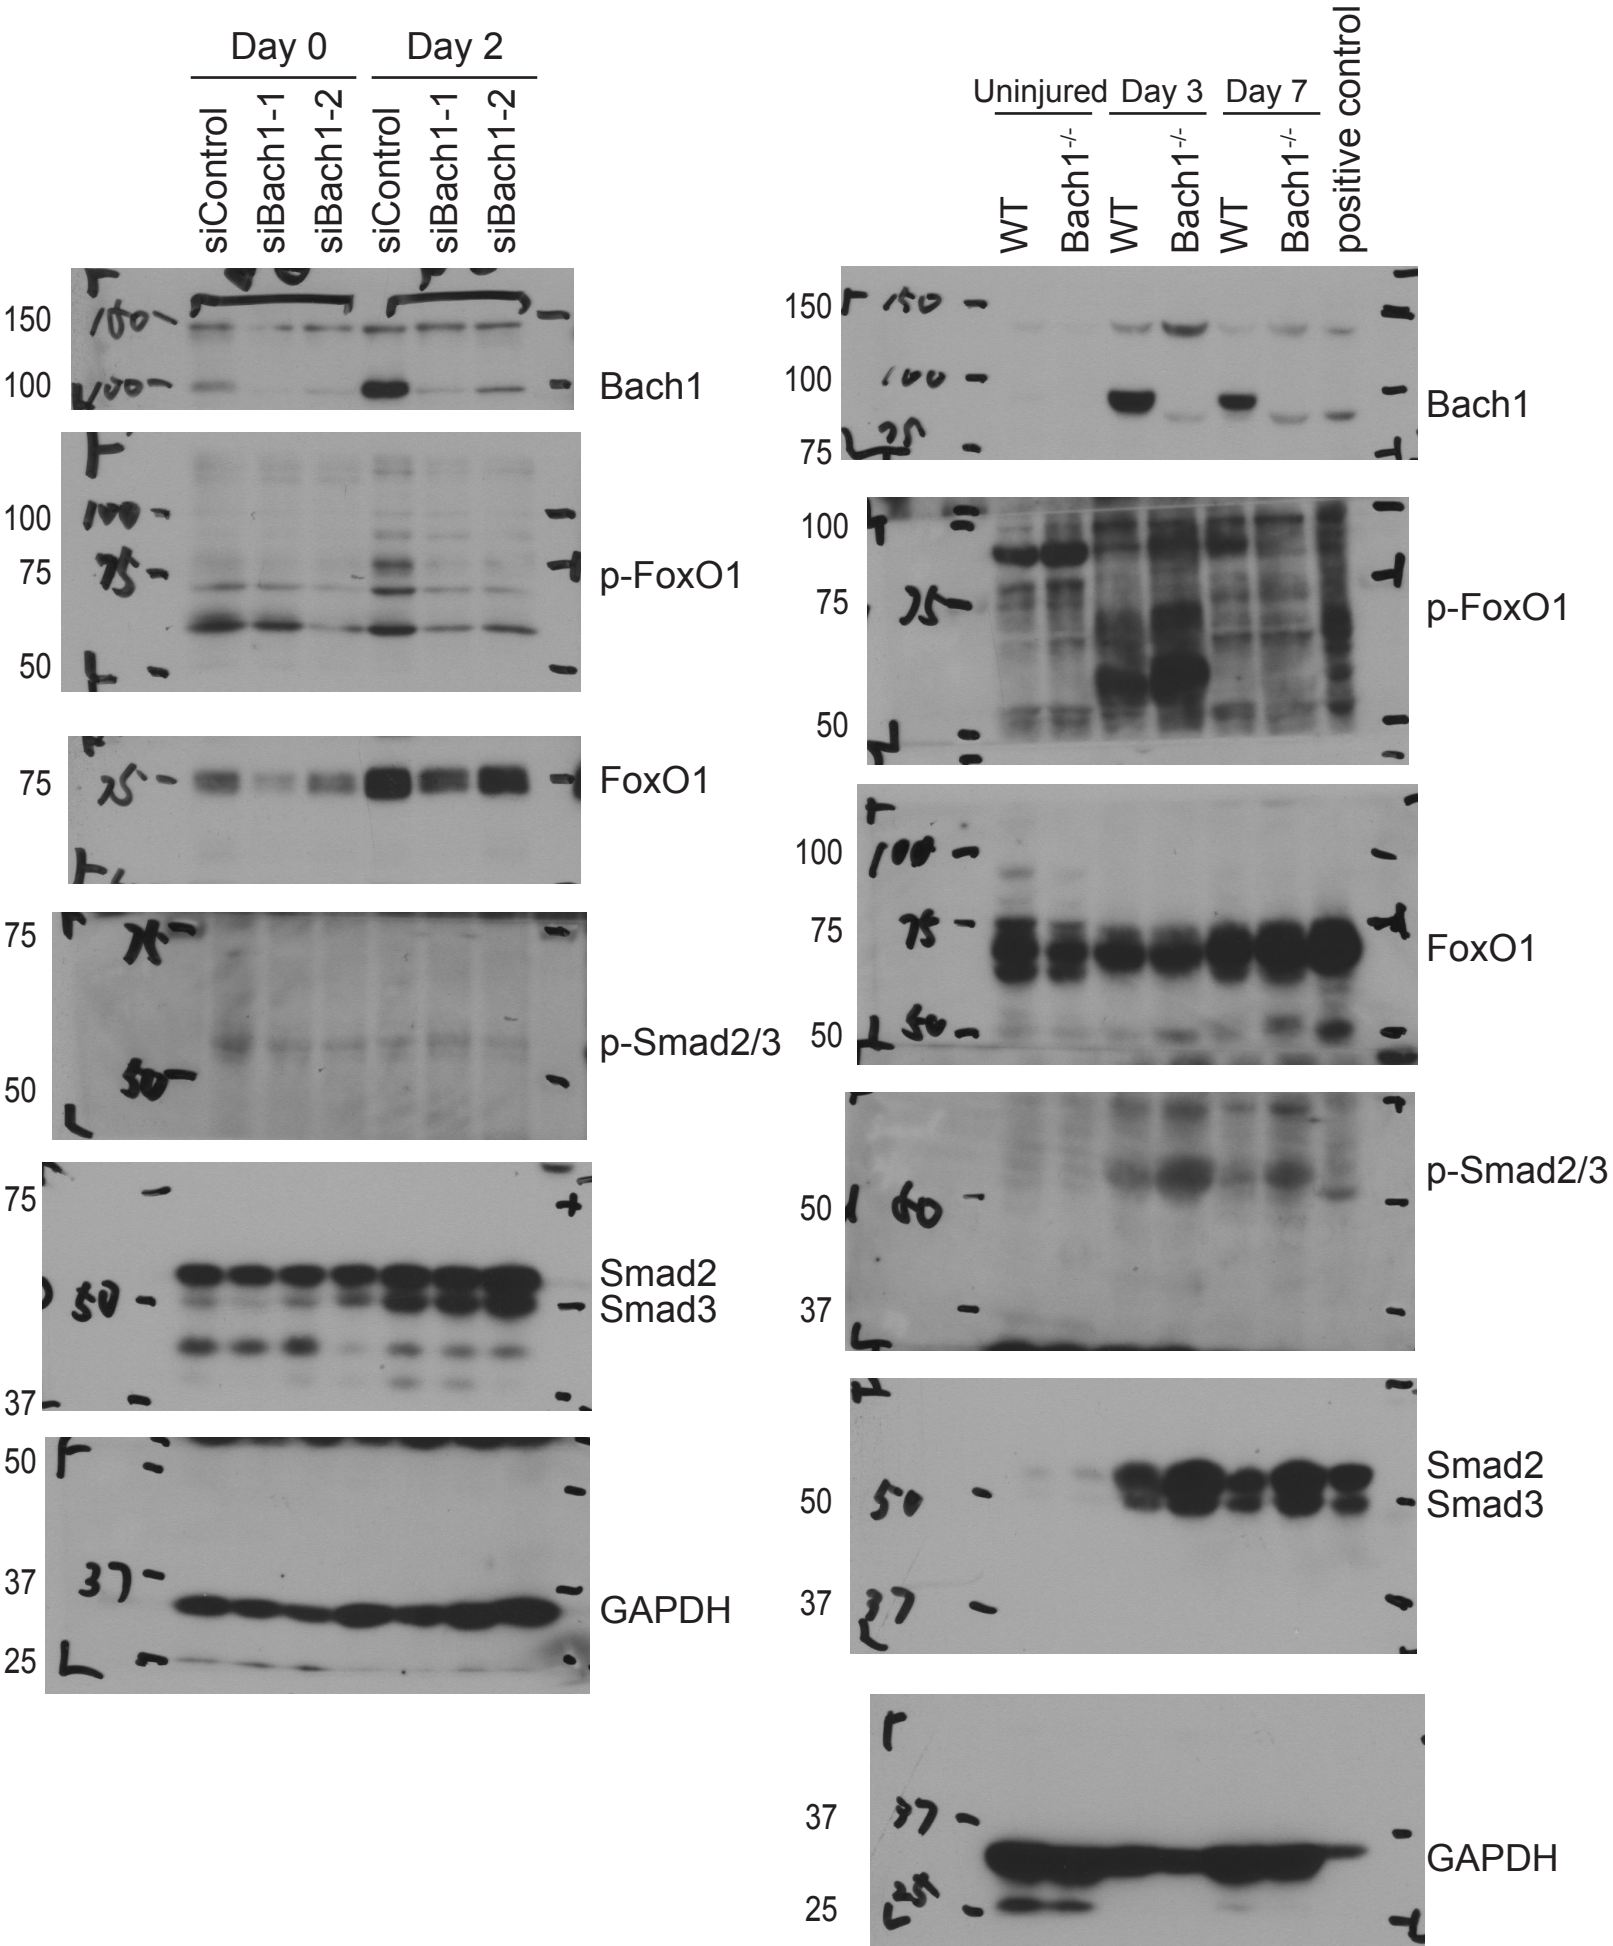

Fig 12

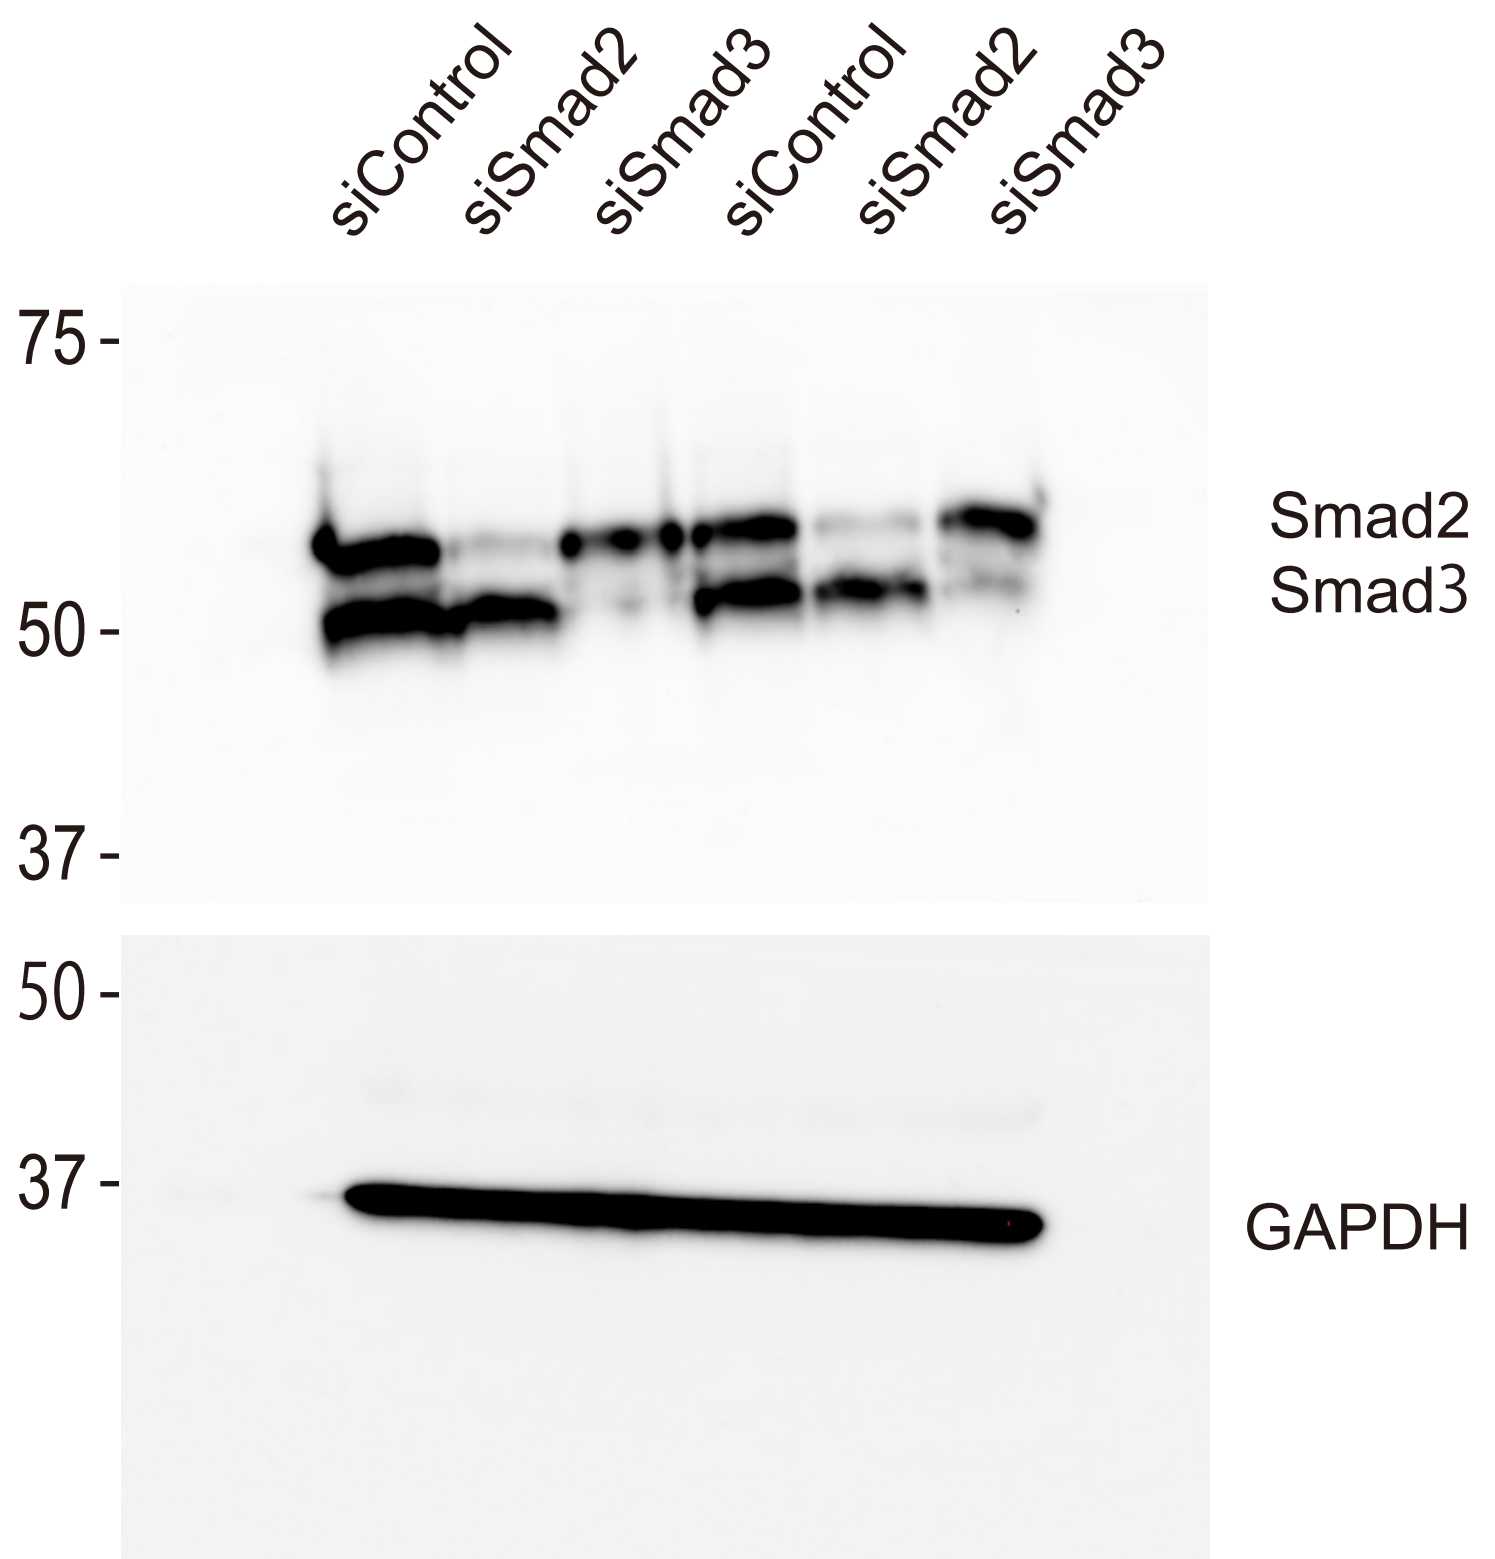

Supplement: pone.0236781.s001.pdf [file pone.0236781.s001.pdf]
